# Supplementary material for: Mechanically Robust Hybrid POSS Thermoplastic Polyurethanes with Enhanced Surface Hydrophobicity
Source: Polymers (Basel). 2019 Feb 20;11(2):373. doi: 10.3390/polym11020373 (PMC6419223; doi:10.3390/polym11020373)
Supplement: Supplementary file 1 [file polymers-11-00373-s001.pdf]

# Mechanically Robust Hybrid POSS Thermoplastic Polyurethanes with Enhanced Surface Hydrophobicity

Xiuhuan Song <sup>1</sup>, Xiaoxiao Zhang <sup>1</sup>, Tianduo Li <sup>1</sup>, Zibiao Li <sup>2,\*</sup> and Hong Chi <sup>1,\*</sup>

<sup>1</sup> Shandong Provincial Key Laboratory of Molecular Engineering, School of Chemistry and Pharmaceutical Engineering, Qilu University of Technology (Shandong Academy of Sciences), Jinan, China 250353

<sup>2</sup> Institute of Materials Research and Engineering, A\*STAR (Agency for Science, Technology and Research), 2 Fusionopolis Way, Innovis, #08-03, Singapore 138634, Singapore

\* Correspondence: ch9161@gmail.com; Tel.: +86-135-5319-7297

Received: 24 January 2019; Accepted: 18 February 2019; Published: 20 February 2019

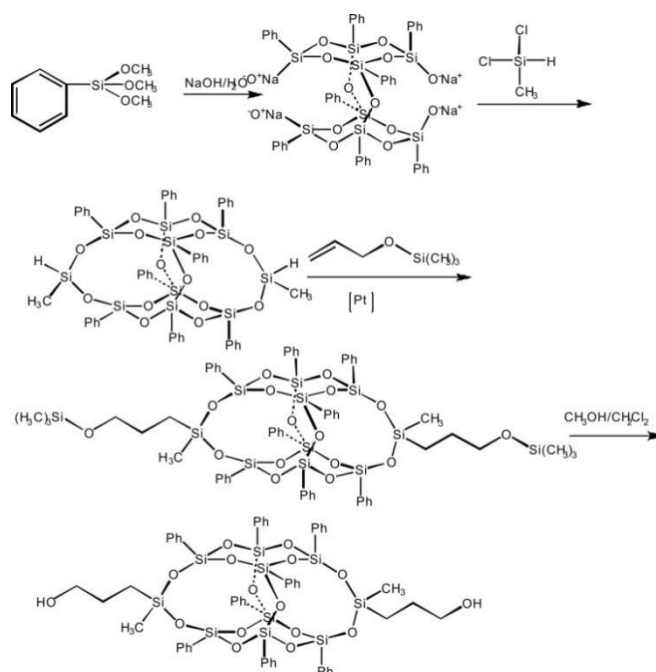

**Figure S1.** Schematic procedure of synthesizing B-POSS.

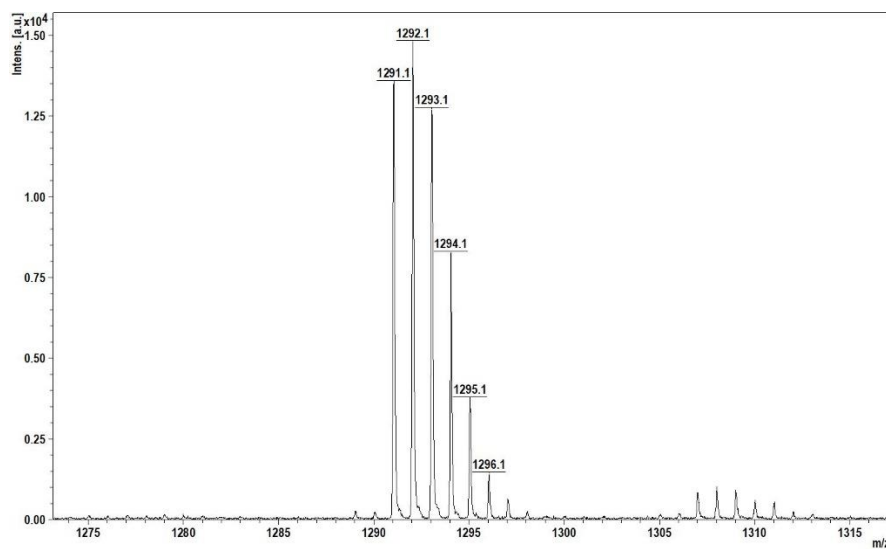

**Figure S2.** MALDI-TOF mass spectrum of B-POSS.

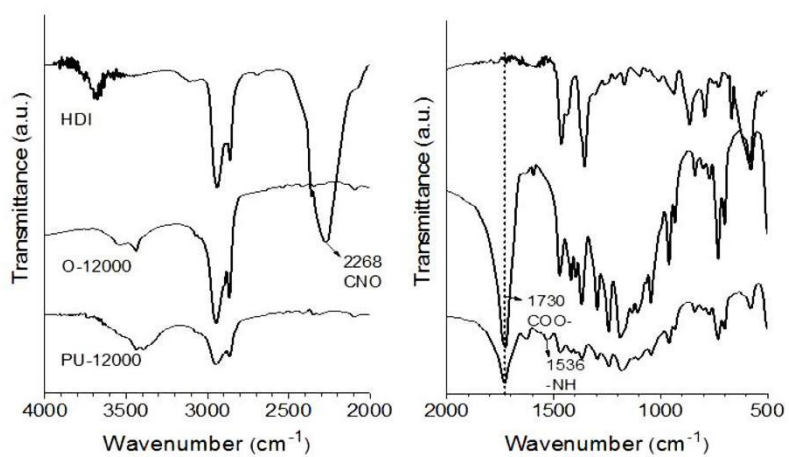

**Figure S3.** FTIR spectra of HDI, O-12000, PU-12000.

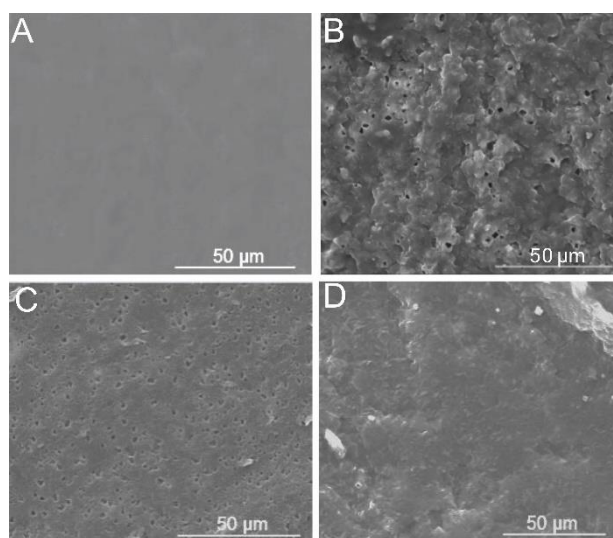

**Figure S4.** SEM images of neat PU (A); PU-10000 (B); PU-12000 (C); PU-14000 (D).

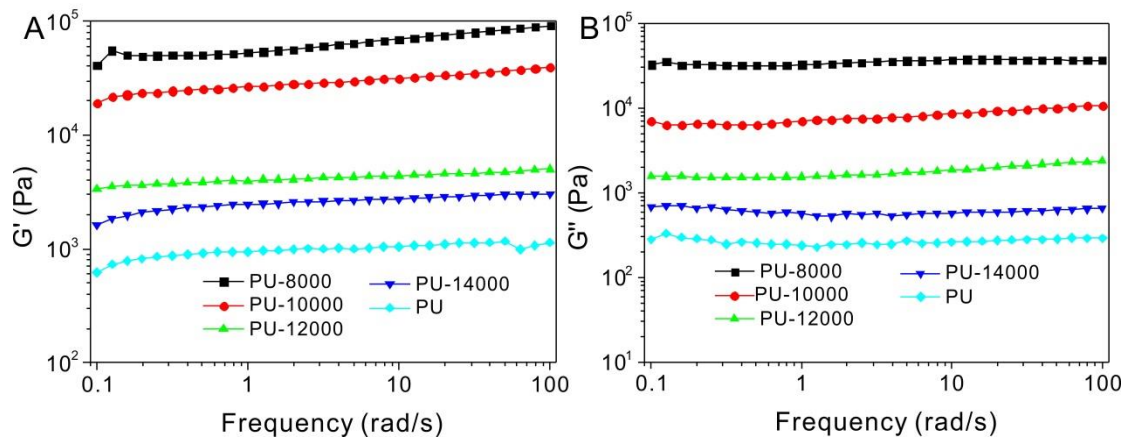

**Figure S5.** Dynamic frequency sweep of:  $G'$  (A) and  $G''$  (B) for neat PU, PU-8000, PU-10000, PU-12000 and PU-14000 at 0.5% strain.

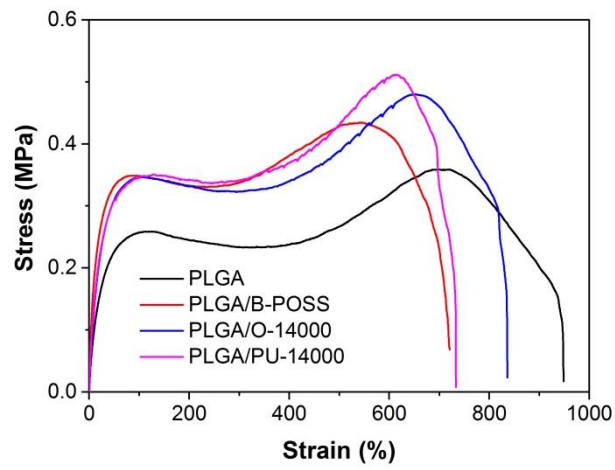

**Figure S6.** Stress-strain curves of PLGA, PLGA/B-POSS, PLGA/O-14000 and PLGA/PU-14000.
